# Supplementary material
Source: Springer Nature journal article supplement (https://www.springermedizin.de/resource/supplementary/13054_2012_1069_MOESM3_ESM.pdf/9711132)

A

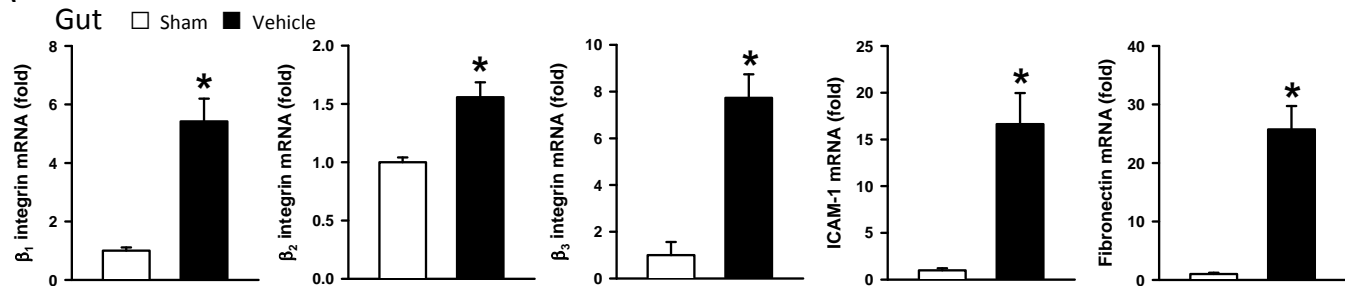

B

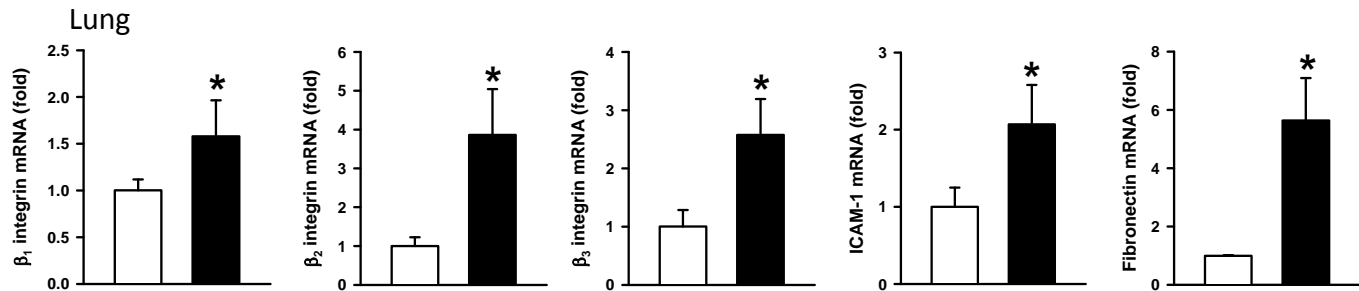

Supplement: MOESM3 [file 9711132]
